# Supplementary material
Source: ML conference proceedings conference paper supplement (https://openaccess.thecvf.com/content/WACV2024/html/Doshi_A_Multimodal_Benchmark_WACV_2024_paper.html)
Supplement: Supplementary file 1 [file Doshi_A_Multimodal_Benchmark_WACV_2024_supplemental.pdf]

# A Multimodal Benchmark and Improved Architecture for Zero Shot Learning

Keval Doshi, Amanmeet Garg, Burak Uz Kent, Xiaolong Wang, Mohamed Omar  
Amazon Prime Video

{kcdos, amanmega, burauzke, xiaowanf, omarmk}@amazon.com

In this supplementary, we provide additional details regarding the implementation and extend the ablation studies from the manuscript.

## 1. Additional Implementation Details

### 1.1. Multiscale Video Transformer

To extract the visual representations from videos, we leverage the multiscale video transformer (MVITv2) architecture proposed in [8]. To have a fair comparison with existing approaches and avoid a direct overlap with unseen classes, we follow the training protocol proposed in [2] and remove the classes that have a semantic relatedness (SR) score of less than 0.05 with respect to UCF and ActivityNet classes. This results in 105 overlapping classes, and 595 non-overlapping classes. We train the MVITv2 model on these 595 classes (K595) to compare with the approaches in Table 4 & 5. On the other hand, [11] proposes training on Sports-1M dataset, which does not have the majority of videos available. To circumvent this issue, we directly use the visual features extracted in their implementation<sup>1</sup>.

## 2. Additional Ablation Studies

### 2.1. Sensitivity analysis of sigma

We show the sensitivity to sigma values in Fig. 2. We observe that the performance is not very sensitive to the value of sigma.

### 2.2. Comparison to video based approaches

While there has been limited progress in multimodal zero-shot learning, there are several existing works that only leverage the video modality for zero-shot action recognition. In Table 1, we compare the performance using the video branch of the proposed MZST model to recent methods. For a fair comparison, we follow the training and evaluation protocol along with the splits discussed in [2]. All the methods are evaluated by randomly splitting the dataset in half and averaging the results over 10 trials. We can

| Method                    | UCF          | ActivityNet |
|---------------------------|--------------|-------------|
| DataAug [15]              | 18.3         | -           |
| InfDem [13]               | 17.8         | -           |
| Bidirectional [14]        | 21.4         | -           |
| TARN [1]                  | 19           | -           |
| Action2Vec [5]            | 22.1         | -           |
| OD [9]                    | 26.9         | -           |
| CLUSTER [4]               | 46.4         | -           |
| DASZL [7]                 | 48.9         | -           |
| GGM [9]                   | 20.3         | -           |
| PS-ZSAR (662 classes) [6] | 49.2         | -           |
| E2E (605 classes) [2]     | 44.1         | 26.6        |
| ViSET-96(505 classes) [3] | 45.6         | 35.8        |
| MZST-V (Ours)             | <b>49.78</b> | <b>38.1</b> |

Table 1. Comparison with the state-of-the-art video-only methods on standard benchmark datasets.

clearly observe that the proposed approach outperforms existing approaches by 4.18% on the UCF dataset and 2.3% on the ActivityNet dataset. This demonstrates the effectiveness of the multiscale representation learning leveraged by the MZST architecture.

### 2.3. Train/Test Splits

Due to the lack of a zero-shot evaluation set, in early video zero-shot literature the datasets were *randomly* split to create train-test sets, leading multiple train/test splits. On the other hand, recent approaches [10, 11] have proposed specific splits such that the test classes do not overlap with the pretraining dataset classes, therefore creating multiple splits is no longer possible. So we use the train-test splits proposed in AVCA.

### 2.4. Few-Shot setting

We follow GGM’s setting [12] and fine-tune the MLP layer of our model on few-samples from each unseen class, and then evaluate the few-shot performance. The performance is averaged over 5 trials.

<sup>1</sup><https://github.com/ExplainableML/TCAF-GZSL>

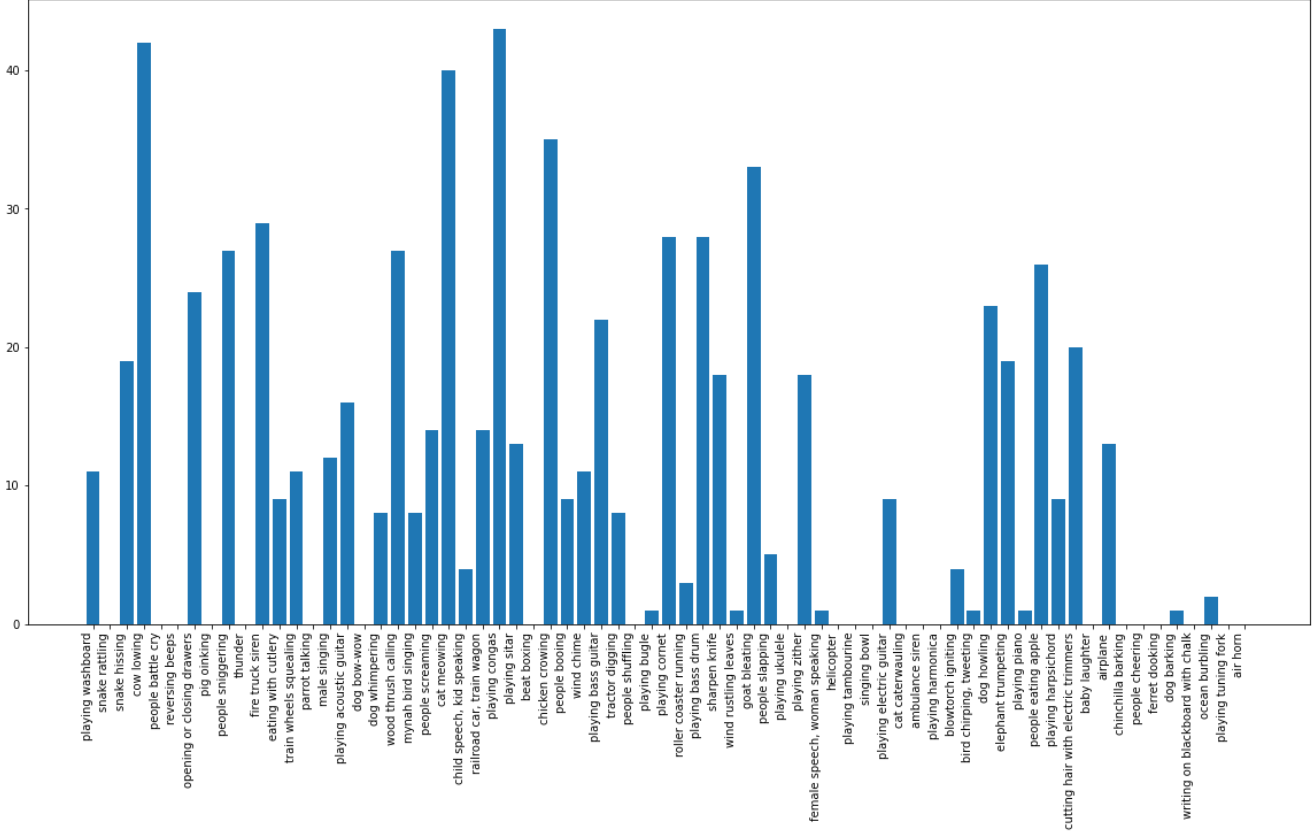

Figure 1. Correct predictions per class on the test split of VGG-Sound dataset.

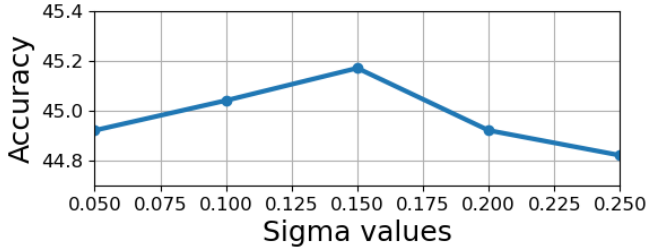

Figure 2. Sensitivity to sigma values

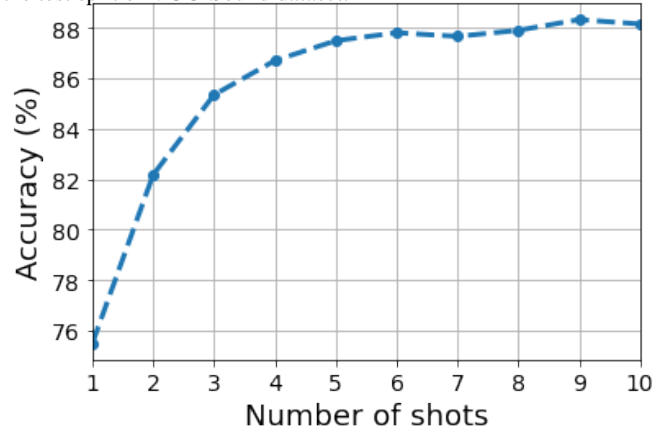

Figure 3. Few-Shot Performance

### 3. Limitations

In Fig. 1, we demonstrate the performance of the proposed MZST approach on the test split of the VGG-Sound dataset proposed in [10]. While MZST is able to predict several classes correctly, there are a few classes where the total number of correct predictions are zero. For example, *baby laughing* and *people giggling* have similar sounds, but to differentiate them requires a fine grained object level knowledge between a baby and a person. However, such object level information is generally missing in video models which are used to infer the appearance of an object.

### References

- [1] Mina Bishay, Georgios Zoumpourlis, and Ioannis Patras. Tarn: Temporal attentive relation network for few-shot and zero-shot action recognition. *arXiv preprint arXiv:1907.09021*, 2019. 1
- [2] Biagio Brattoli and others. Rethinking zero-shot video classification: End-to-end training for realistic applications. In *CVPR*, 2020. 1
- [3] Keval Doshi and Yasin Yilmaz. Zero-shot action recognition

with transformer-based video semantic embedding. *arXiv preprint arXiv:2203.05156*, 2022. 1

- [4] Gowda et al. Cluster: Clustering with reinforcement learning for zero-shot action recognition. *arXiv preprint arXiv:2101.07042*, 2021. 1
- [5] Meera Hahn, Andrew Silva, and James M Rehg. Action2vec: A crossmodal embedding approach to action learning. *arXiv preprint arXiv:1901.00484*, 2019. 1
- [6] Alec Kerrigan, Kevin Duarte, Yogesh Rawat, and Mubarak Shah. Reformulating zero-shot action recognition for multi-label actions. *Advances in Neural Information Processing Systems*, 34:25566–25577, 2021. 1
- [7] Tae Soo Kim, Jonathan Jones, Michael Peven, Zihao Xiao, Jin Bai, Yi Zhang, Weichao Qiu, Alan Yuille, and Gregory D Hager. Daszl: Dynamic action signatures for zero-shot learning. In *Proceedings of the AAAI conference on artificial intelligence*, volume 35, pages 1817–1826, 2021. 1
- [8] Yanghao Li, Chao-Yuan Wu, Haoqi Fan, Karttikeya Mangalam, Bo Xiong, Jitendra Malik, and Christoph Feichtenhofer. Mvitv2: Improved multiscale vision transformers for classification and detection. In *Proceedings of the IEEE/CVF Conference on Computer Vision and Pattern Recognition*, pages 4804–4814, 2022. 1
- [9] Devraj Mandal, Sanath Narayan, Sai Kumar Dwivedi, Vikram Gupta, Shuaib Ahmed, Fahad Shahbaz Khan, and Ling Shao. Out-of-distribution detection for generalized zero-shot action recognition. In *Proceedings of the IEEE/CVF Conference on Computer Vision and Pattern Recognition*, pages 9985–9993, 2019. 1
- [10] Otniel-Bogdan Mercea et al. Audio-visual generalised zero-shot learning with cross-modal attention and language. In *CVPR*, 2022. 1, 2
- [11] Otniel-Bogdan Mercea, Thomas Hummel, A Koepke, and Zeynep Akata. Temporal and cross-modal attention for audio-visual zero-shot learning. In *European Conference on Computer Vision*, pages 488–505. Springer, 2022. 1
- [12] Ashish Mishra et al. A generative approach to zero-shot and few-shot action recognition. In *WACV*, 2018. 1
- [13] Alina Roitberg, Ziad Al-Halah, and Rainer Stiefelhagen. Informed democracy: voting-based novelty detection for action recognition. *arXiv preprint arXiv:1810.12819*, 2018. 1
- [14] Qian Wang and Ke Chen. Zero-shot visual recognition via bidirectional latent embedding. *International Journal of Computer Vision*, 124(3):356–383, 2017. 1
- [15] Xun Xu, Timothy M Hospedales, and Shaogang Gong. Multi-task zero-shot action recognition with prioritised data augmentation. In *European Conference on Computer Vision*, pages 343–359. Springer, 2016. 1
